# Supplementary material for: Perturbative triples correction to domain-based local pair natural orbital variants of Mukherjee's state specific coupled cluster method
Source: Royal Society of Chemistry journal article supplement (doi:10.1039/c8cp03577f), 2019-01-01
Supplement: c8cp03577f1.pdf [file c8cp03577f1.pdf]

**Electronic Supplementary Information:**  
**Perturbative triples correction to Domain-based Local  
Pair Natural Orbital variant of Mukherjee's state specific  
coupled cluster method**

Jakub Lang<sup>ab</sup>, Jiří Brabec<sup>a</sup>, Masaaki Saitow<sup>c</sup>, Jiří Pittner<sup>a</sup>, Frank Neese<sup>c</sup>,  
and Ondřej Demel<sup>a\*</sup>

<sup>a</sup> J. Heyrovský Institute of Physical Chemistry, v.v.i., Academy of Sciences  
of the Czech Republic, Dolejškova 3, 18223 Prague 8, Czech Republic

<sup>b</sup> Department of Physical and Macromolecular Chemistry, Faculty of Science,  
Charles University of Prague, Hlavova 2030, 12840 Prague 2, Czech Republic

<sup>c</sup> Max Planck Institute of Chemical Energy Conversion, Mülheim an der Ruhr,  
Germany

ondrej.demel@jh-inst.cas.cz

# 1 Dependence of the total correlation energy and triples energy on different cut-offs for *p*-benzyne

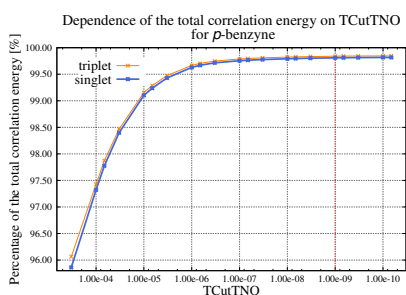

(a)

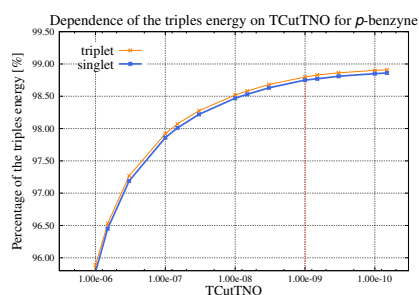

(b)

Figure S1: Percentage of the (a) total correlation and (b) triples energy recovered for *p*-benzyne by DLPNO-MkCCSD(T) as a function of *TCutTNO*. Red dashed line corresponds to default cut-off.

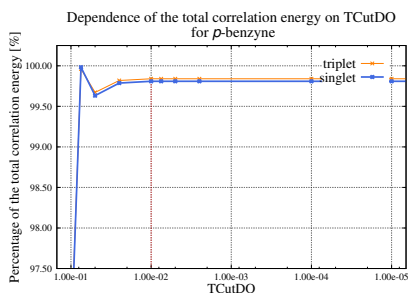

(a)

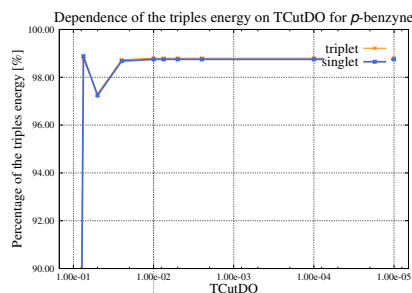

(b)

Figure S2: Percentage of the (a) total correlation and (b) triples energy recovered for *p*-benzyne by DLPNO-MkCCSD(T) as a function of *TCutDO*. Red dashed line corresponds to default cut-off.

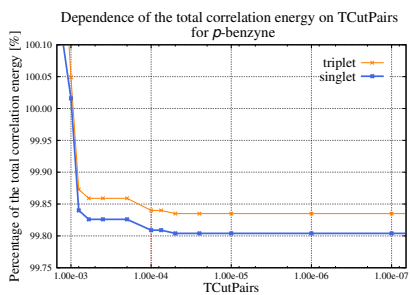

(a)

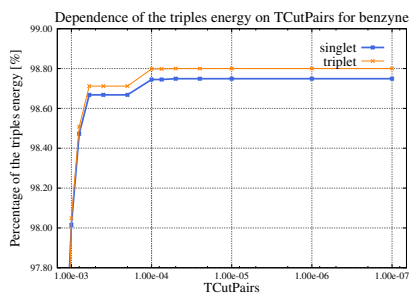

(b)

Figure S3: Percentage of the (a) total correlation and (b) triples energy recovered for *p*-benzyne by DLPNO-MkCCSD(T) as a function of *TCutPairs*. Red dashed line corresponds to default cut-off.
